# Supplementary material
Source: publisher figshare collection journal article supplement (https://asha.figshare.com/ndownloader/files/39030065)

**Supplemental Material S1.** Scatter plot matrix of raw accuracies for the data sets included in Figure 1.

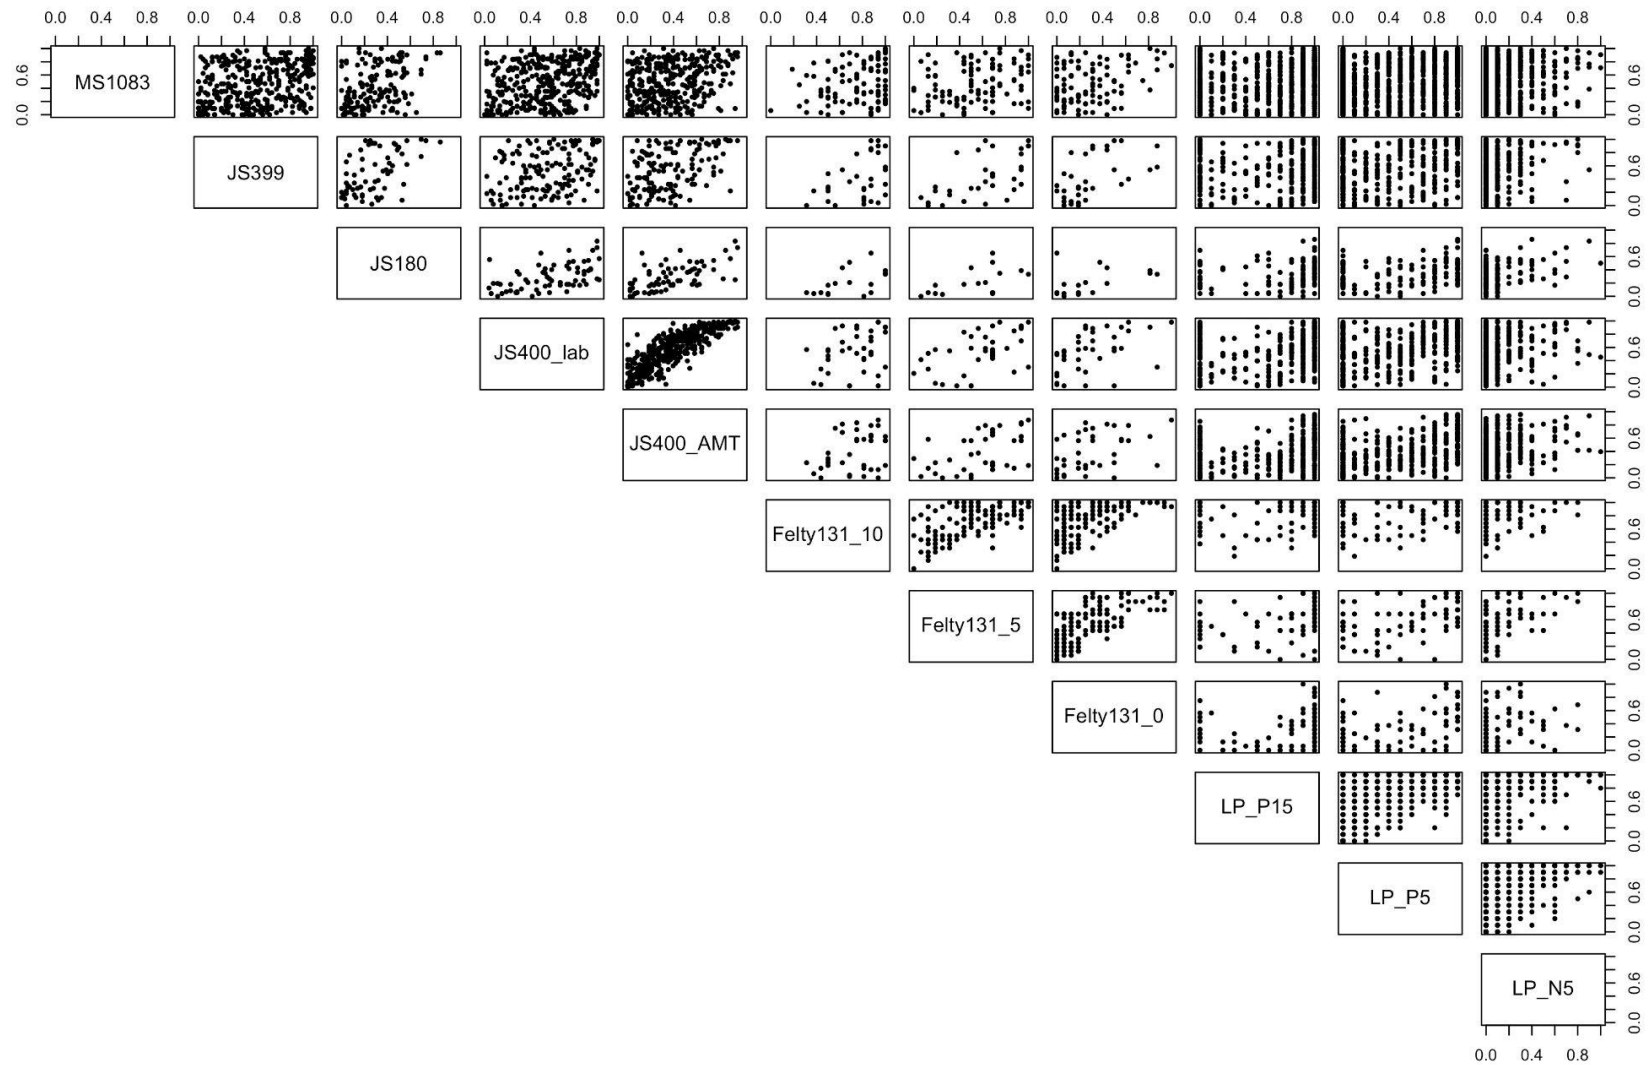

Supplement: Supplementary file 1 [file 39030065]
